# Supplementary material for: Mechanical properties and structures under the deformation of thiophene copolymers with cyclic siloxane units
Source: Royal Society of Chemistry journal article supplement (doi:10.1039/d2py00765g), 2022-01-01
Supplement: d2py00765g1.pdf [file d2py00765g1.pdf]

## **Supplementary Information**

### **Mechanical properties and structure under deformation of thiophene copolymers with cyclic siloxane units**

*Takuya Matsumoto,<sup>\*a</sup> Masaki Kashimoto,<sup>a</sup> Chihiro Kubota,<sup>a</sup> Shohei Horike,<sup>a</sup> Kenji  
Ishida,<sup>a</sup> Atsunori Mori,<sup>a</sup> and Takashi Nishino<sup>\*a</sup>*

<sup>a</sup>Department of Chemical Science and Engineering, Graduate School of Engineering,  
Kobe University, Rokko, Nada, Kobe, 657-8501, Japan

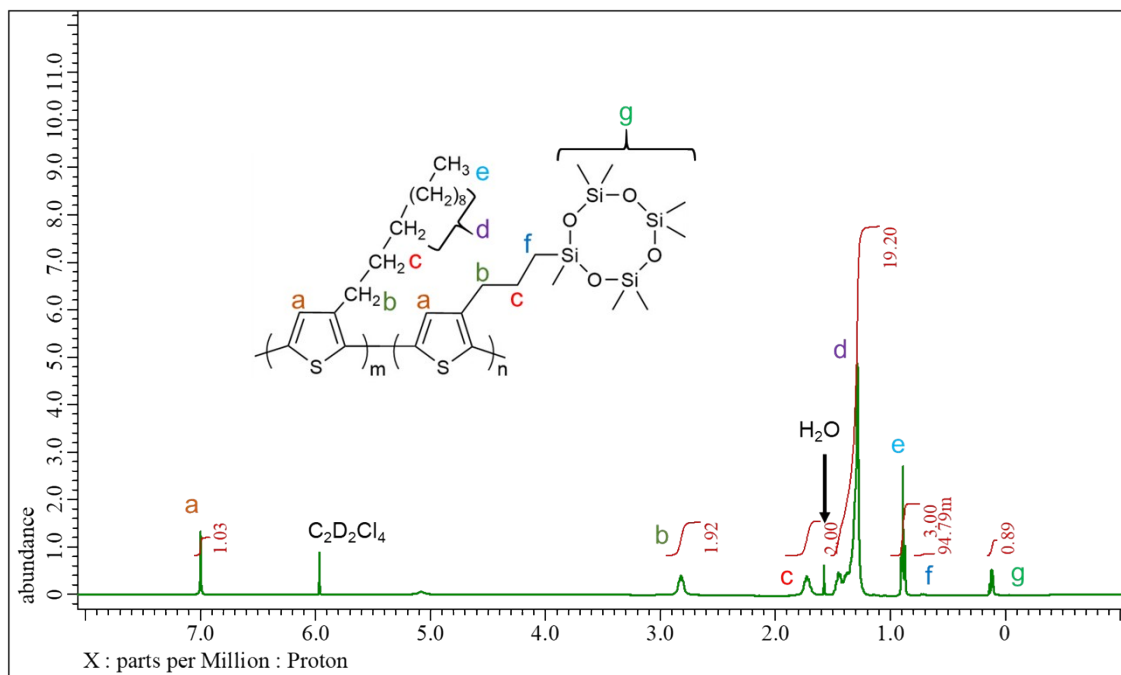

Figure S1.  $^1\text{H}$  NMR spectrum of P(3DDT-3CSiT).

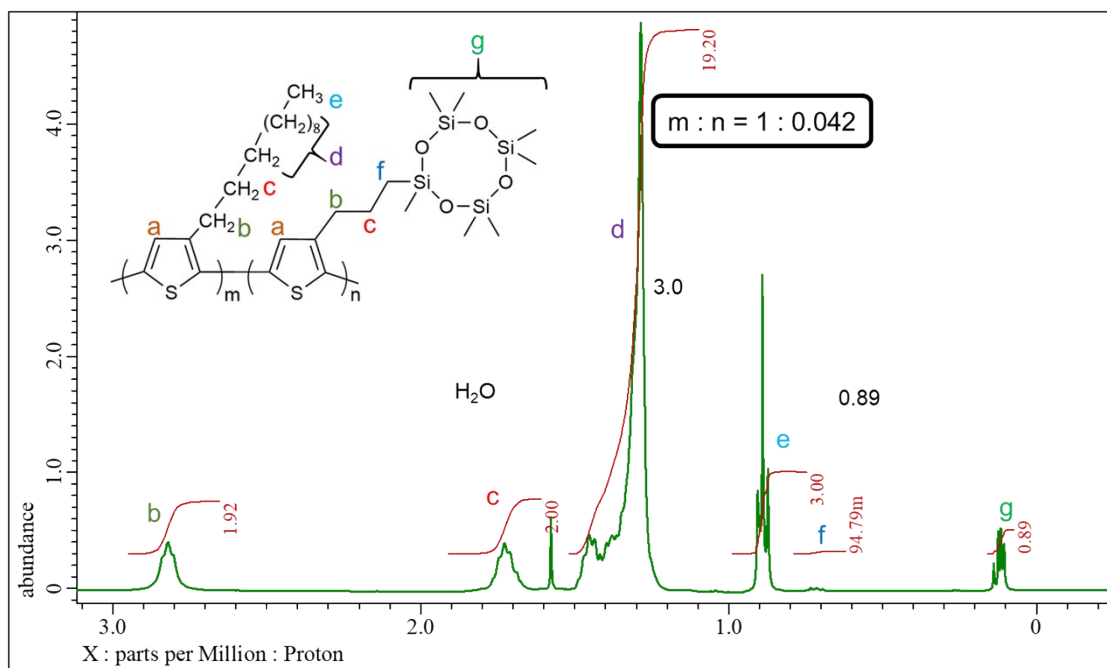

Figure S2. Expanded  $^1\text{H}$  NMR spectrum of P(3DDT-3CSiT).

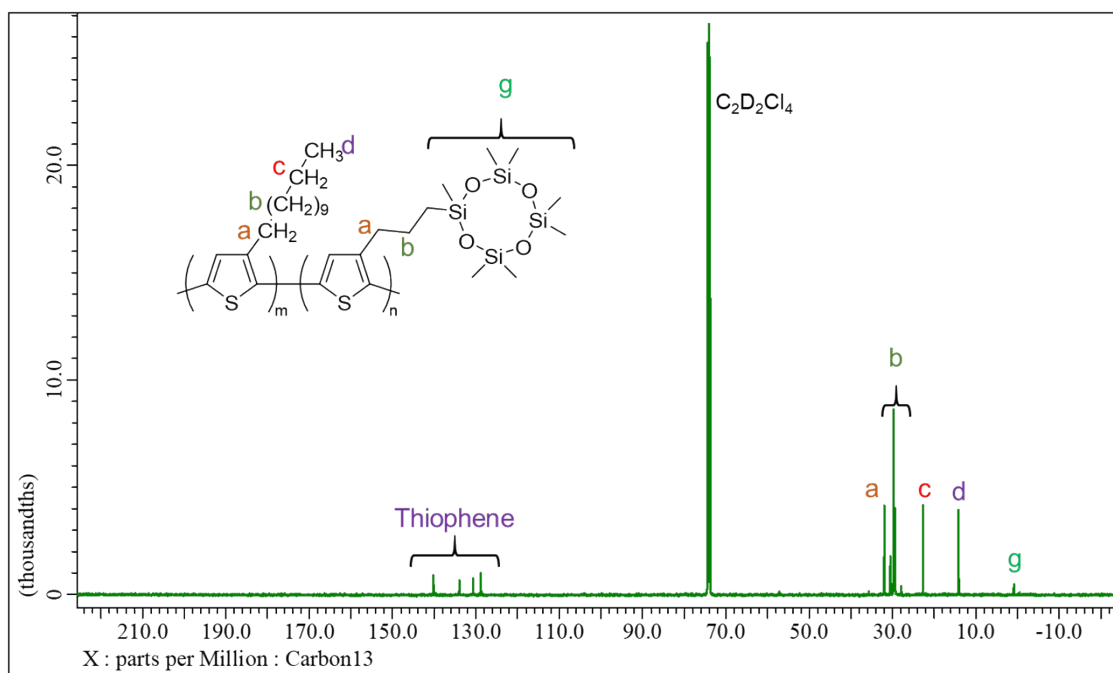

Figure S3.  $^{13}\text{C}$  NMR spectrum of P(3DDT-3CSiT).

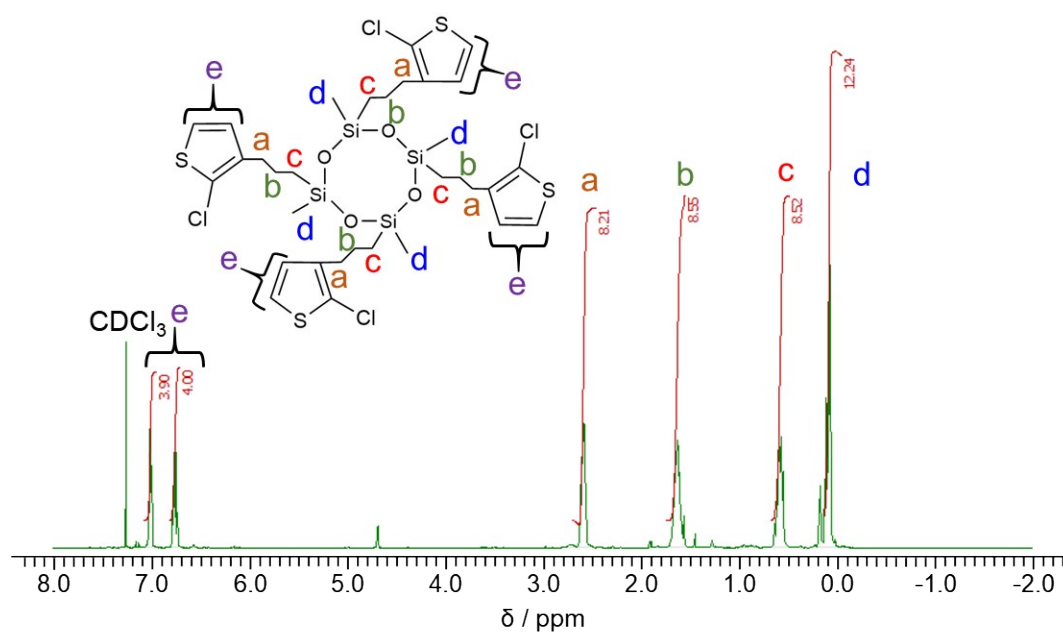

Figure S4.  $^1\text{H}$  NMR spectrum of 3tetraCSiT.

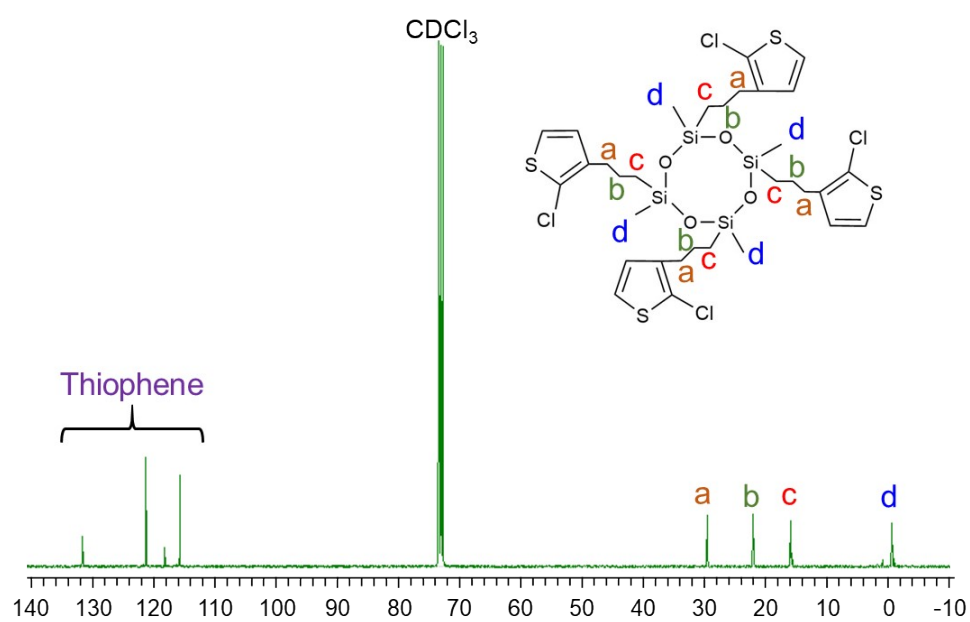

Figure S5.  $^{13}\text{C}$  NMR spectrum of 3tetraCSiT.

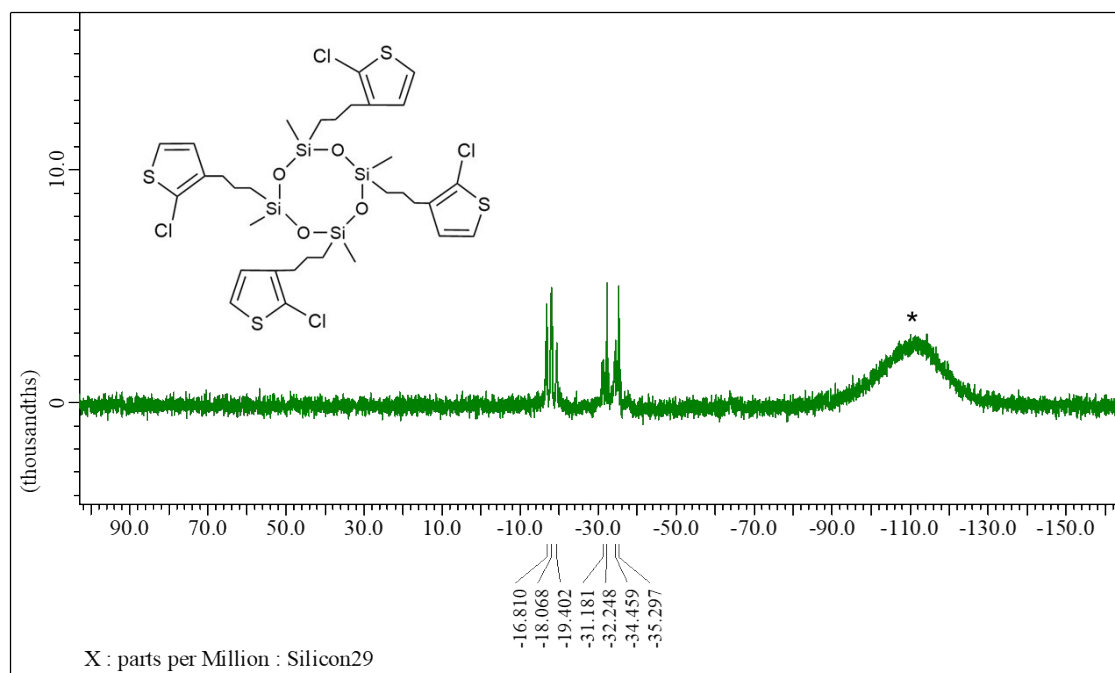

Figure S6.  $^{29}\text{Si}$  NMR spectrum of 3tetraCSiT (\* peak from  $\text{SiO}_2$  of a NMR tube).

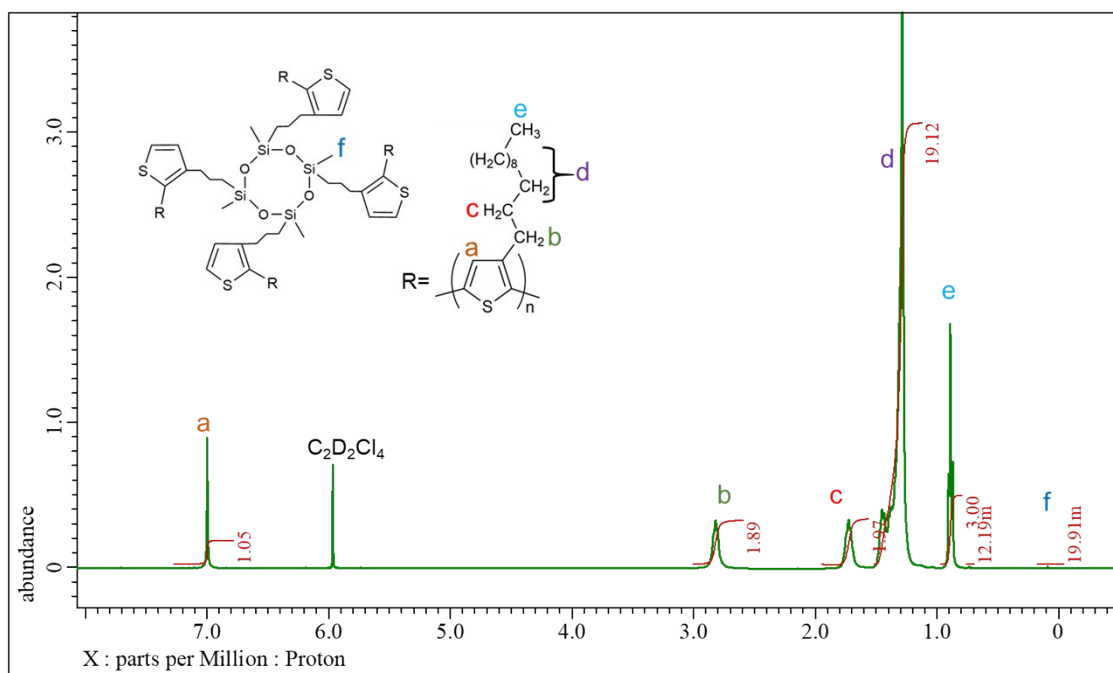

Figure S7.  $^1\text{H}$  NMR spectrum of P(3DDT-3tetraCSiT).



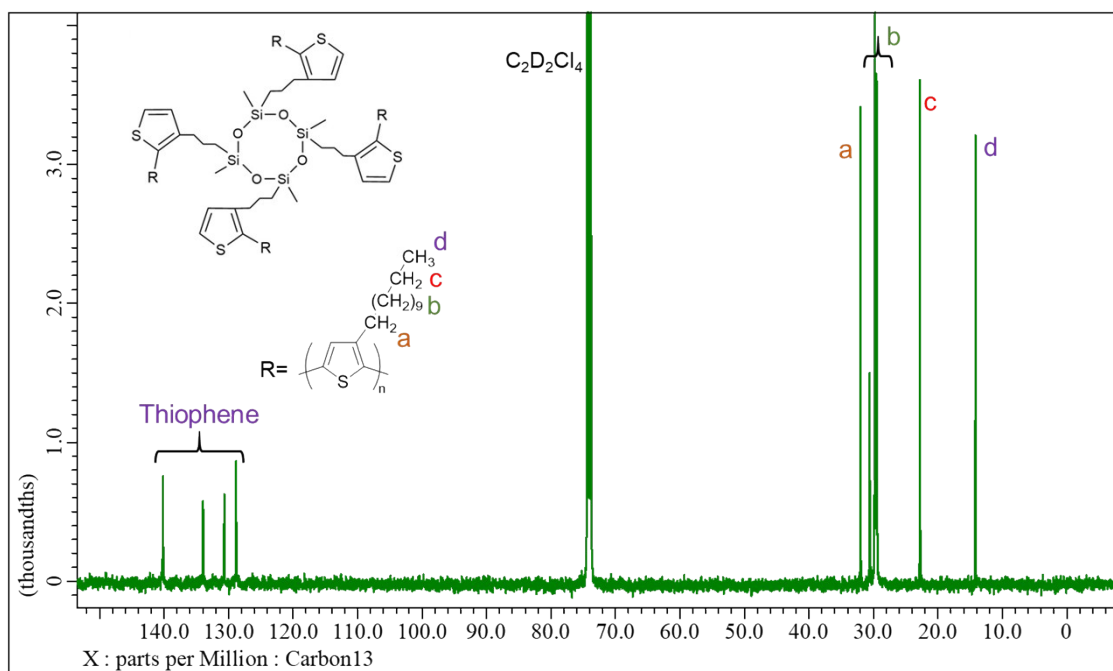

Figure S8.  $^{13}\text{C}$  NMR spectrum of P(3DDT-3tetraCSiT).

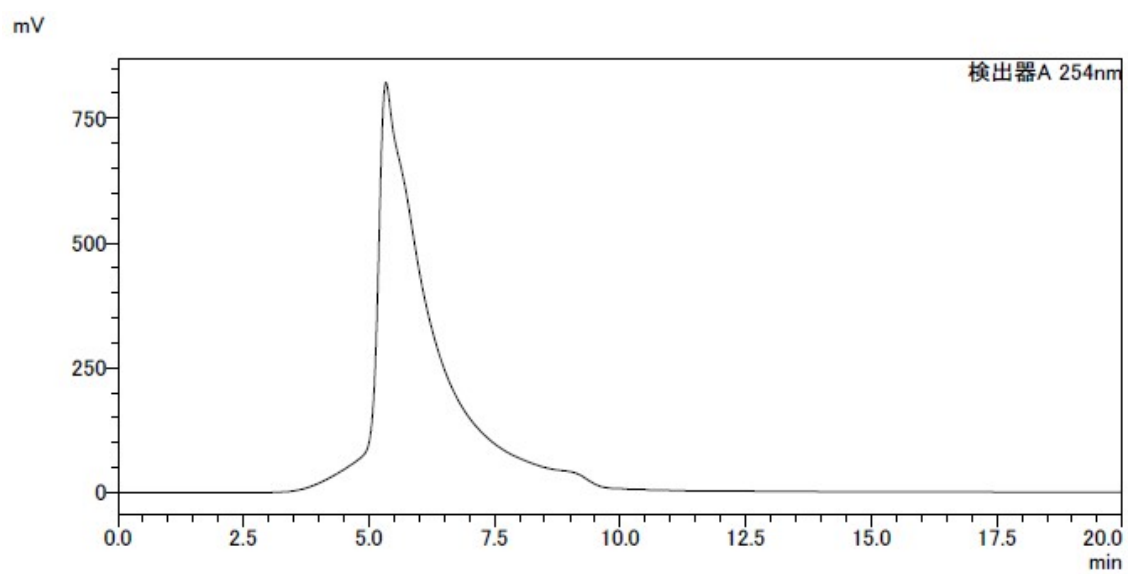

Figure S9. GPC chart of P(3DDT-3CSiT).

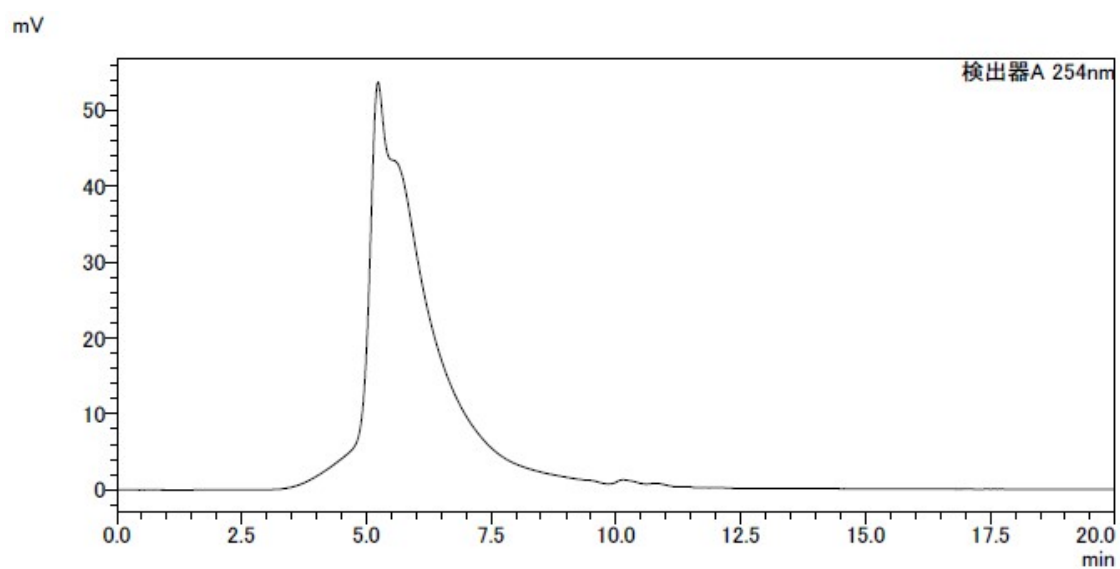

Figure S10. GPC chart of P(3DDT-3tetraCSiT).

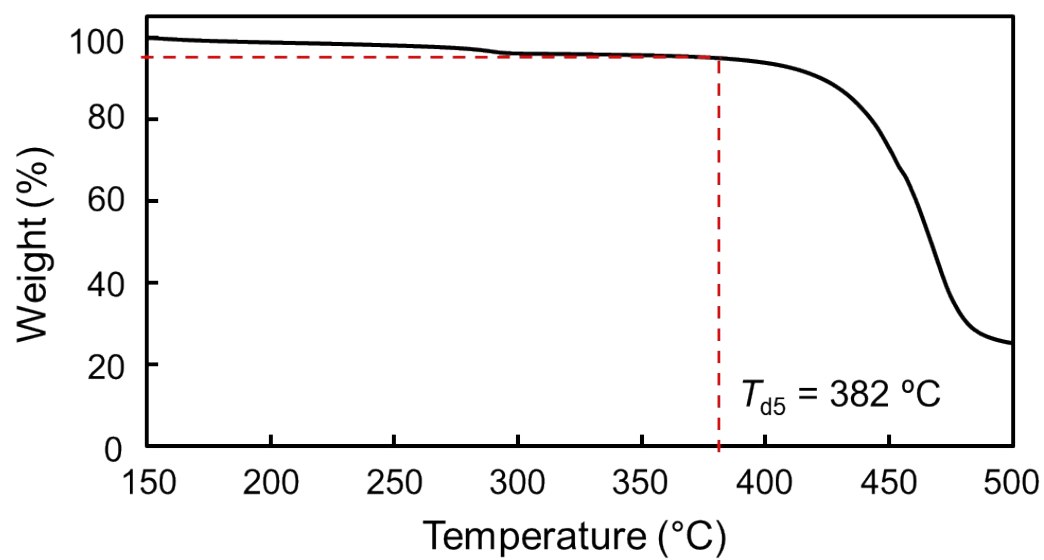

Figure S11. Thermogravimetric curve of P(3DDT-3CSiT).

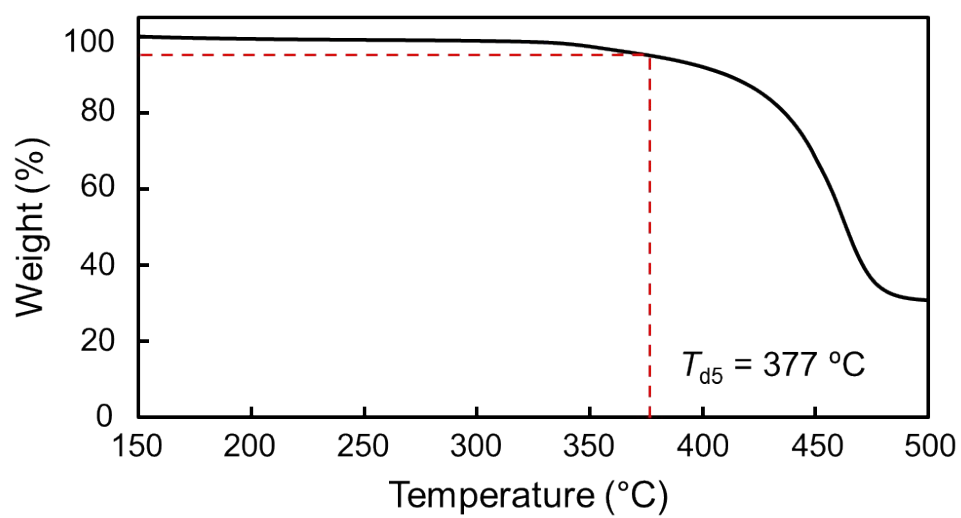

Figure S12. Thermogravimetric curve of P(3DDT-3tetraCSiT).

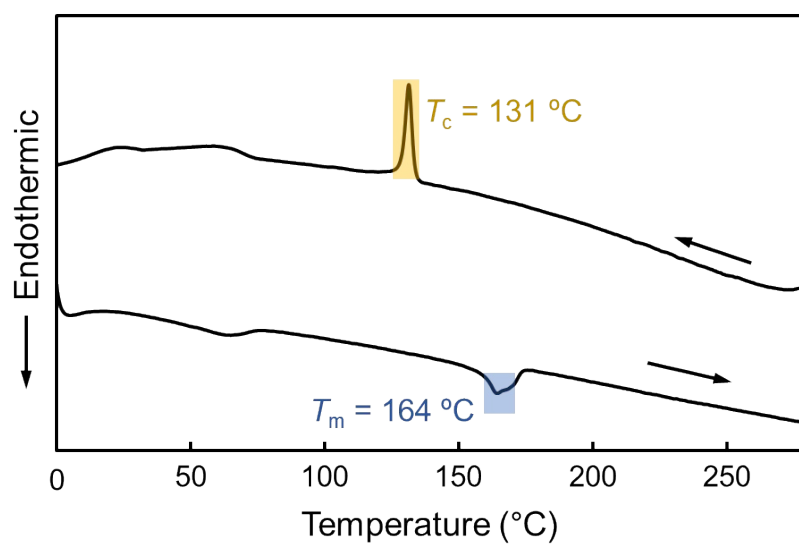

Figure S13. DSC thermogram of P3DDT.

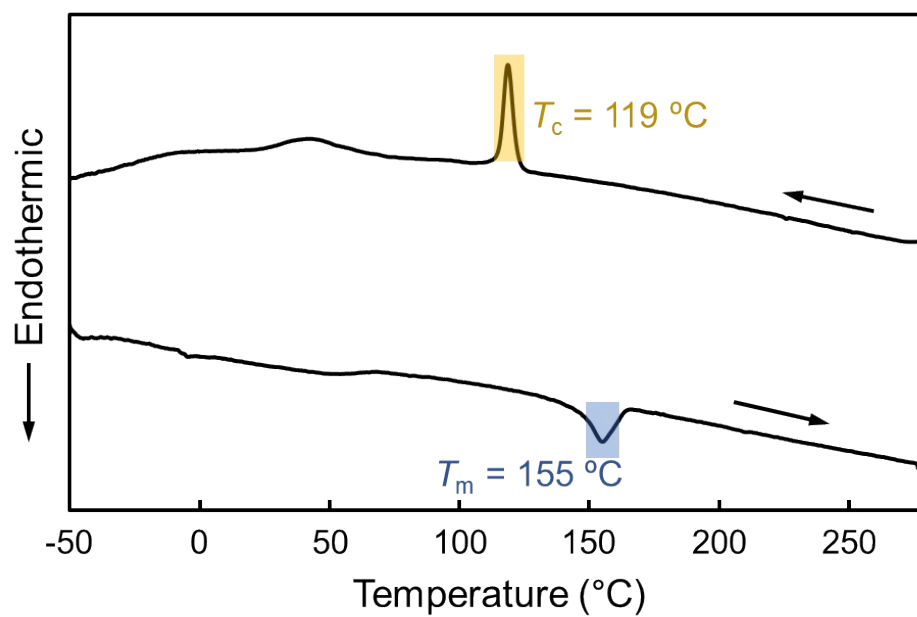

Figure S14. DSC thermogram of P(3DDT-3CSiT).

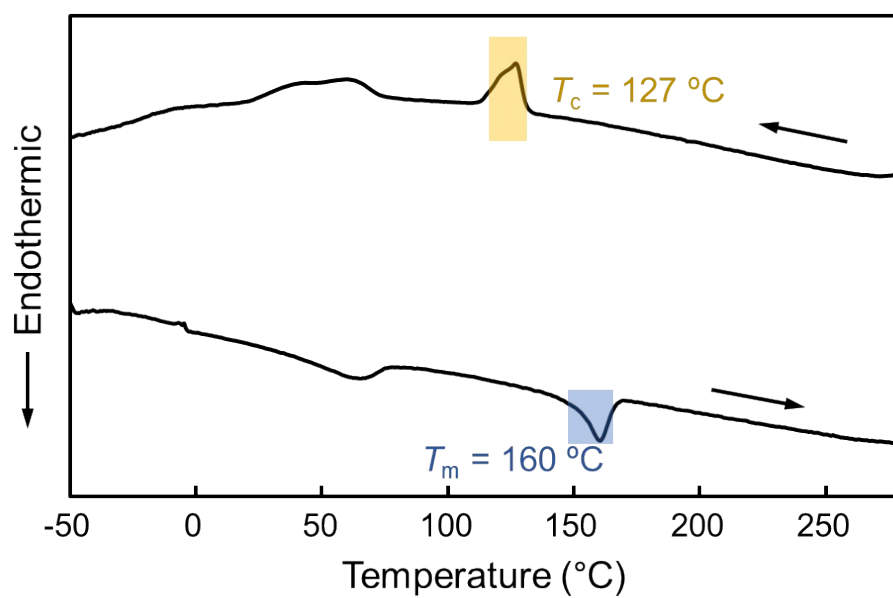

Figure S15. DSC thermogram of P(3DDT-3tetraCSiT).



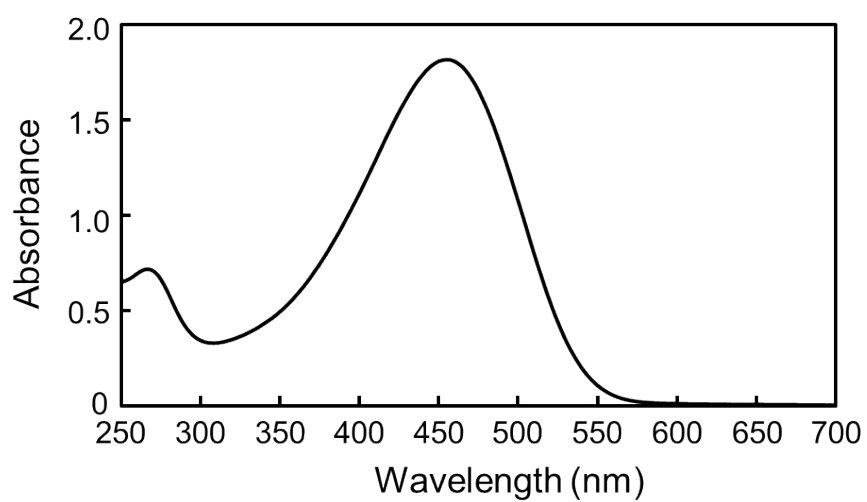

Figure S16. UV—vis absorption spectrum of  $2.1 \times 10^{-4}$  mol/L P(3DDT-3CSiT) in chloroform.

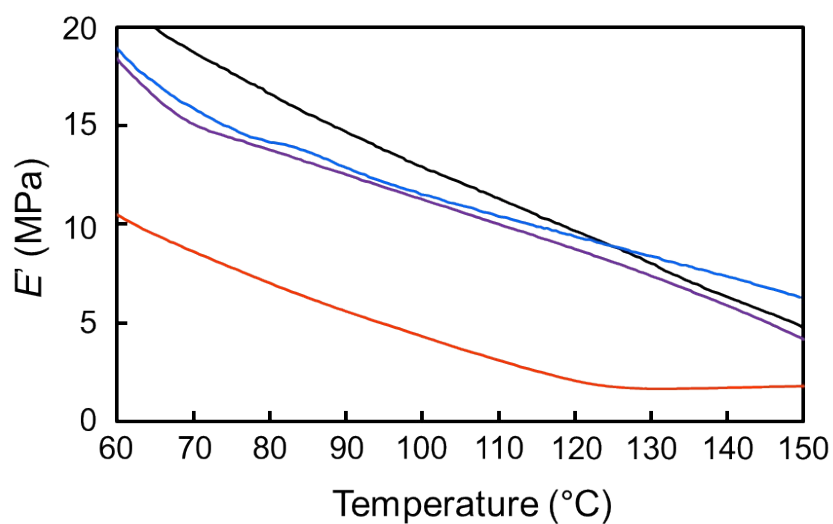

Figure S17. Expanded storage modulus of (black line) Noacid\_P(3DDT-3CSiT), (blue line) Acid\_anneal\_P(3DDT-3CSiT), (red line) Acid\_melt\_P(3DDT-3CSiT) and (blue line) Melt\_P(3DDT-3tetraCSiT) from 60 °C to 150 °C.

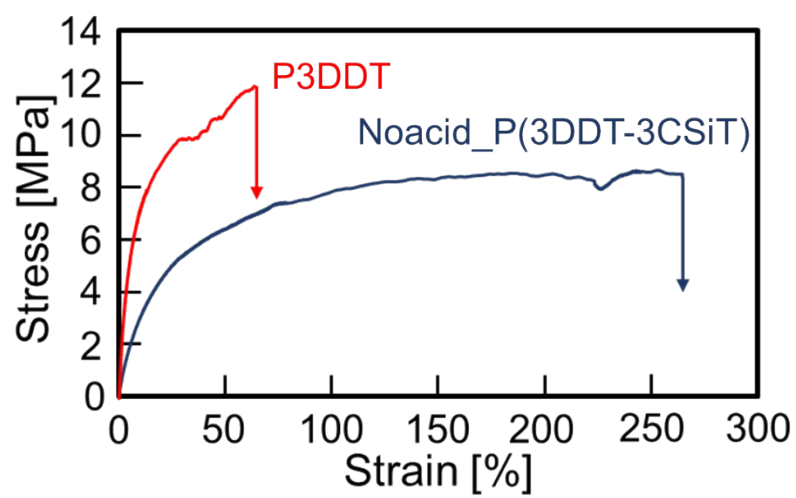

Figure S18. Strain-stress curves of P3DDT and Noacid\_P(3DDT-3CSiT).

Table S1. Mechanical properties of Noacid\_P(3DDT-3CSiT), Acid\_anneal\_P(3DDT-3CSiT), Acid\_melt\_P(3DDT-3CSiT) and Melt\_P(3DDT-3tetraCSiT).

| Sample                    | Young's<br>modulus | Tensile<br>strength | Strain at<br>beaking | Toughnes<br>s     |
|---------------------------|--------------------|---------------------|----------------------|-------------------|
|                           | MPa                | MPa                 | %                    | MJ/m <sup>3</sup> |
| Noacid_P(3DDT-3CSiT)      | 39±2.3             | 9.4±1.2             | 313±47               | 23 ±5.2           |
| Acid_anneal_P(3DDT-3CSiT) | 46±2.5             | 12.0±1.5            | 74±23                | 5.9±2.7           |
| Acid_melt_P(3DDT-3CSiT)   | 41±3.8             | 8.1±1.5             | 64± 7.3              | 3.7±079           |
| Melt_P(3DDT-3tetraCSiT)   | 43±4.3             | 8.9±1.1             | 104±12               | 7.4±1.4           |

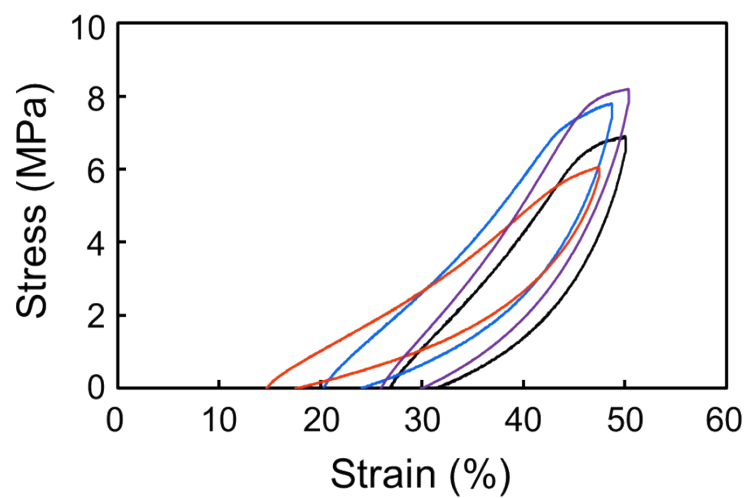

Figure S19. Strain-stress curves of cyclic tensile tests of (black line) Noacid\_P(3DDT-3CSiT), (blue line) Acid\_anneal\_P(3DDT-3CSiT), (red line) Acid\_melt\_P(3DDT-3CSiT) and (blue line) Melt\_P(3DDT-3tetraCSiT) in the 50% strain region.

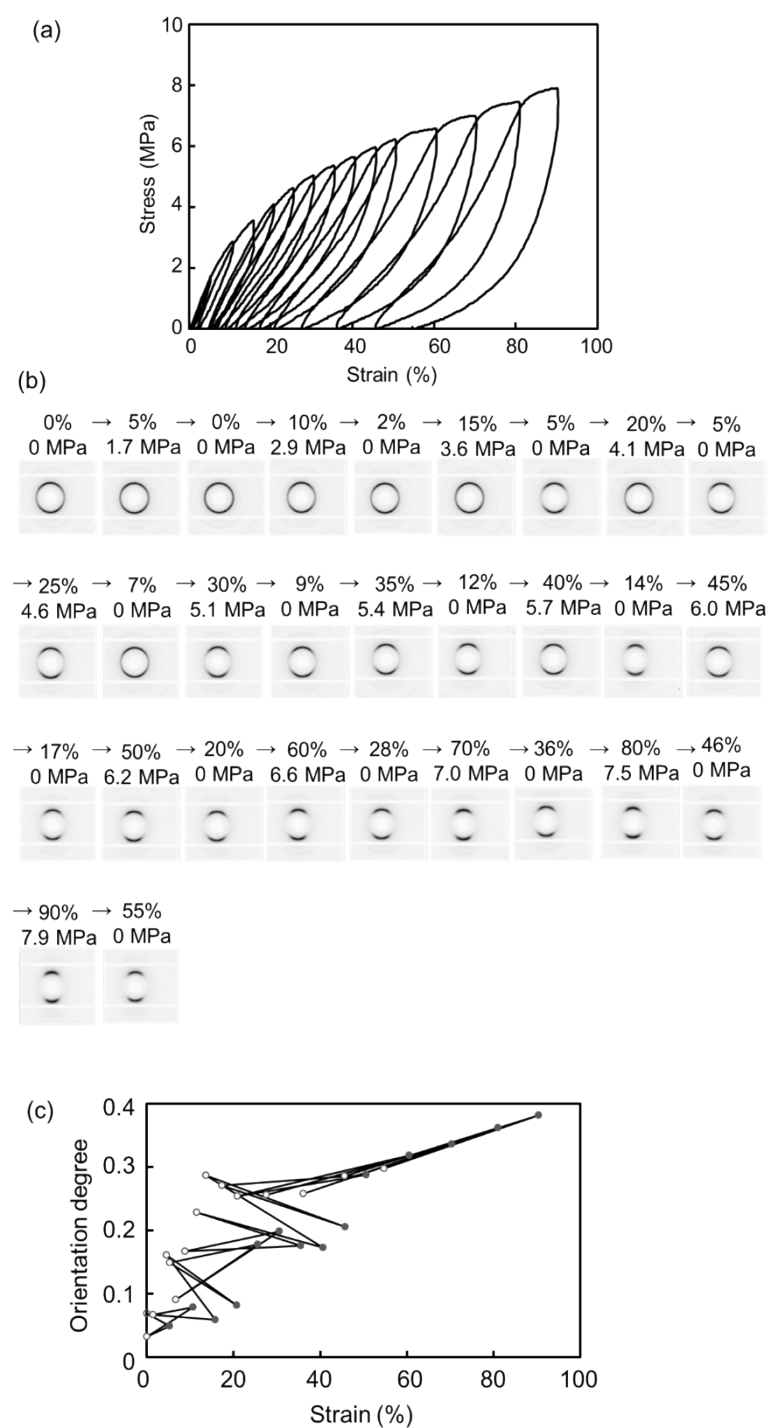

Figure S20. (a) Stress-strain curves, (b) 2D X-ray diffraction images, (c) orientation degrees of Noacid\_P(3DDT-3CSiT) in *in situ* X-ray diffraction pattern measurements under cyclic tensile tests (black circles : loading states, and white circles : unloading states).

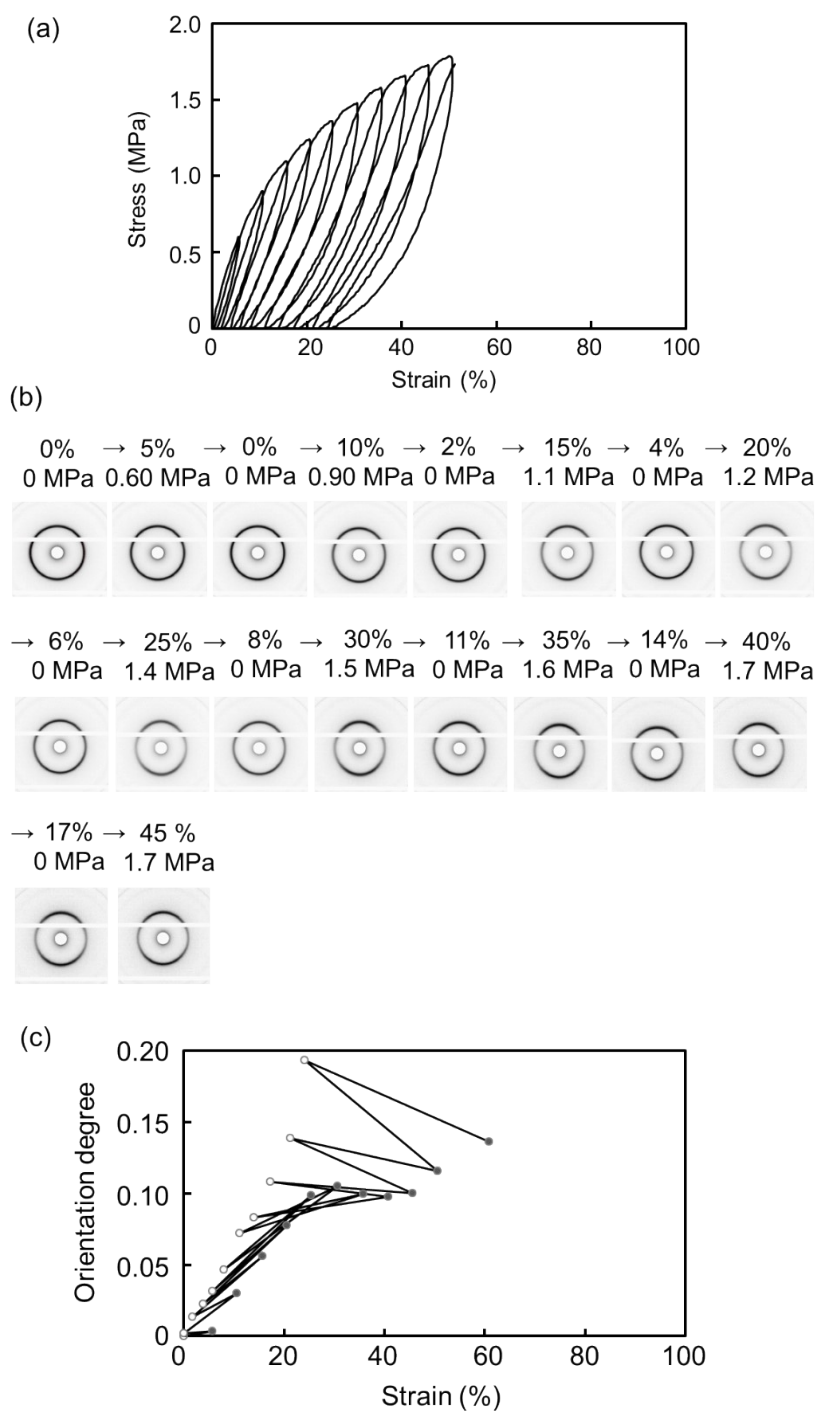

Figure S21. (a) Stress-strain curves, (b) 2D X-ray diffraction images, (c) orientation degrees of Melt\_P(3DDT-3tetraCSiT) in *in situ* X-ray diffraction pattern measurements under cyclic tensile tests (black circles : loading states, and white circles : unloading states).

## Electronic conductive measurements

The electrical resistances of cross-linked polythiophene films were measured in ambient atmosphere by two-point measurement using Keysight Technologies B1500A with voltage ranges of  $-10 \sim 10$  V. VE-2030 (Vacuum Device Equipments) was utilized to deposit Au electrodes onto polymer cast film surfaces under vacuum. The length and thickness of the Au electrodes was 3 mm and 100 nm. The electrical resistivity ( $R$ ) of these samples as function of voltage were calculated by Ohm's law. The average value in the range of the electrical resistivity levelling off were employed as the experimental results of these samples.

Table S2. Electrical resistivity and conductivity of Noacid\_P(3DDT-3CSiT) and Acid\_anneal\_P(3DDT-3CSiT).

|                           | Electrical resistance | Electrical conductivity |
|---------------------------|-----------------------|-------------------------|
|                           | $G\Omega$             | $10^{-8}$ S/cm          |
| Noacid_P(3DDT-3CSiT)      | 3.0                   | 0.065                   |
| Acid_anneal_P(3DDT-3CSiT) | 0.19                  | 1.0                     |
